# Supplementary material for: Cu/AlO(OH)-catalyzed formation of β-enamino ketones/esters under solvent, ligand and base free conditions – experimental and computational studies
Source: Royal Society of Chemistry journal article supplement (doi:10.1039/c2cy20081c), 2012-01-01
Supplement: c2cy20081c.pdf [file c2cy20081c.pdf]

# Cu/Al(O)OH-Catalyzed Formation of $\beta$ -Enamino Ketones / Esters Under Solvent, Ligand and Base Free Conditions – Experimental and Computational Studies

S. Ganesh Babu,<sup>[a]</sup> Brijith Thomas,<sup>[a]</sup> A. Nijamudheen,<sup>[b]</sup> Ayan Datta,<sup>\*[b]</sup> and R. Karvembu<sup>\*[a]</sup>

<sup>[a]</sup> Department of Chemistry, National Institute of Technology, Tiruchirappalli – 620 015, India

<sup>[b]</sup> School of Chemistry, Indian Institute of Science Education and Research, CET Campus,  
Tiruvananthapuram – 695016, India

kar@nitt.edu

## Supporting Infomations

### Catalyst Characterization:

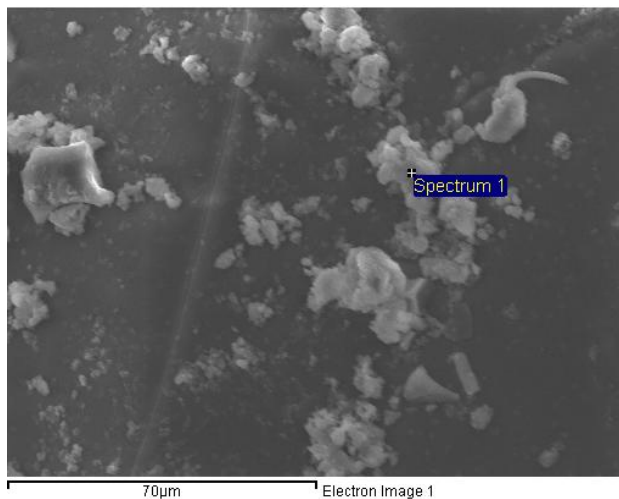

**Fig. S1** SEM image of Cu/Al(O)OH.

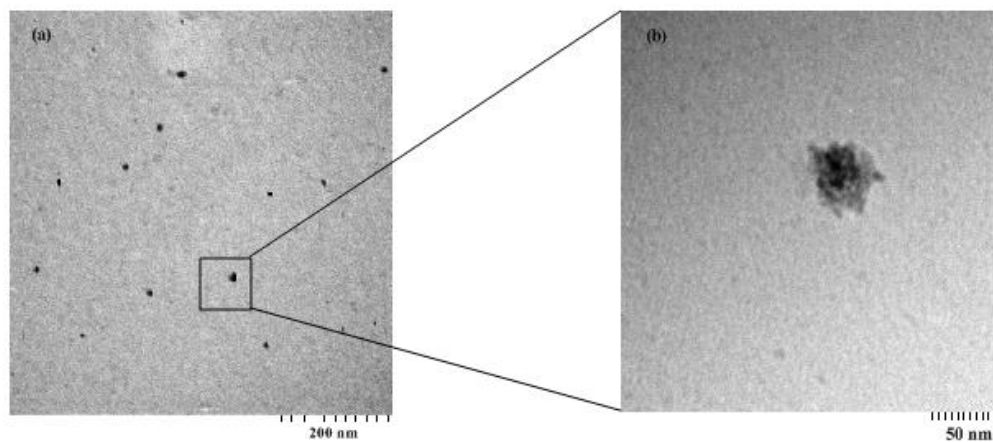

**Fig. S2** HR-TEM Image: (a) low resolution (20 nm bar scale), (b) high resolution (5 nm bar scale).

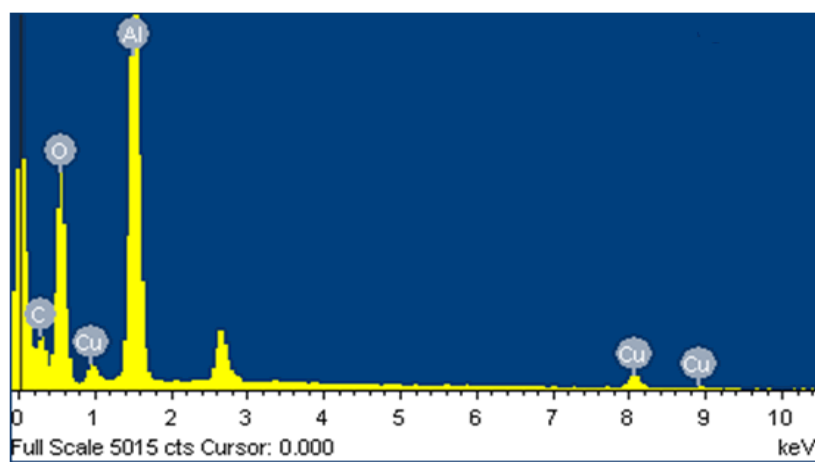

**Fig. S3** SEM-EDX result of Cu/AIO(OH).

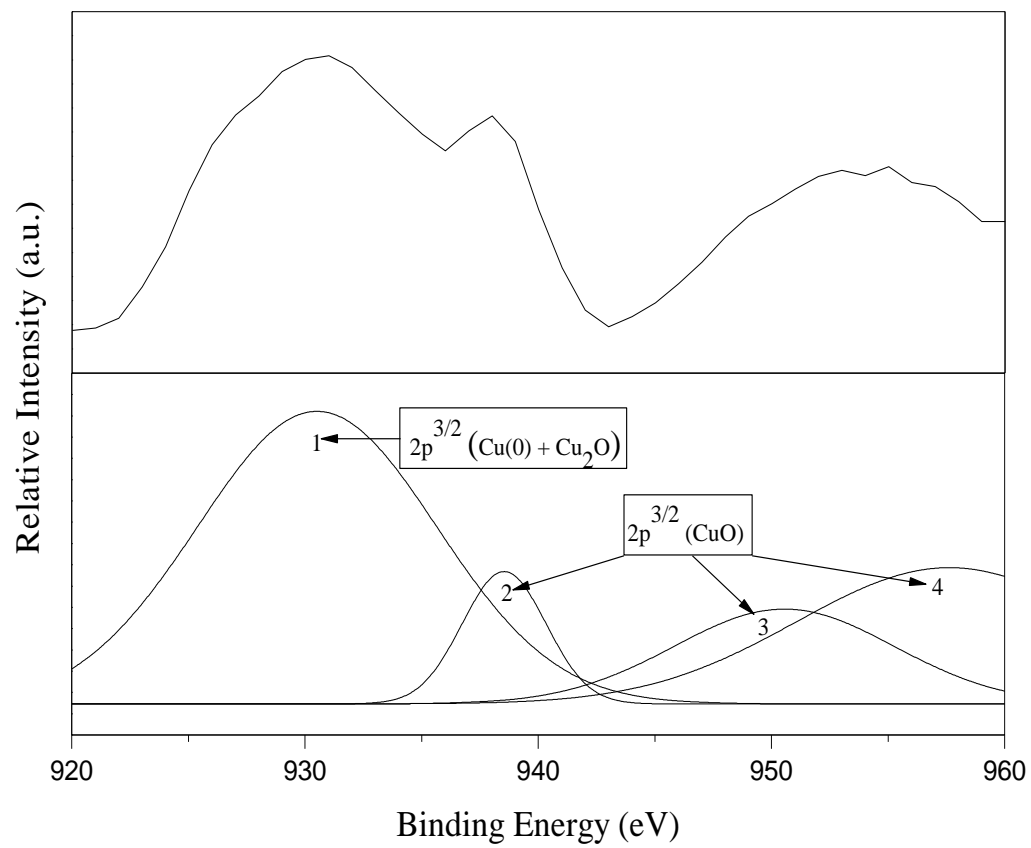

**Fig. S4** XPS spectrum of Cu/AIO(OH).

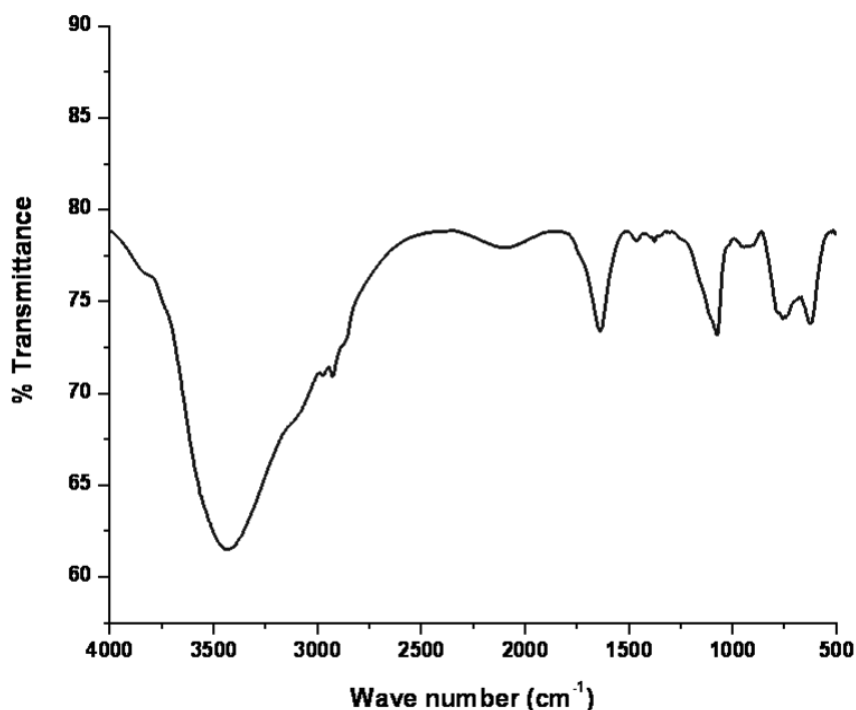

**Fig. S5** FT-IR Spectrum of Cu/AlO(OH).

Peak at 3400 cm<sup>-1</sup> corresponds to OH stretching frequency. The peak at 1075 cm<sup>-1</sup> has been assigned as due to Al=O stretching frequency. The other peaks at 1644 cm<sup>-1</sup>, 1111 cm<sup>-1</sup>, 624 cm<sup>-1</sup> and 516 cm<sup>-1</sup> correspond to Al-O stretching and bending frequencies.

### **GC Conditions:**

GC (Shimadzu-2010) is equipped with 5% diphenyl and 95% dimethyl siloxane, Restek capillary column (60 m length, 0.32 mm dia) and a flame ionization detector (FID). The column temperature was 220°C. The temperatures of the injection port and FID were kept constant at 250°C and 280°C, respectively during product analysis.

## GC DATA

### 1. Condensation of acetyl acetone and aniline (Table 2, entry 1)

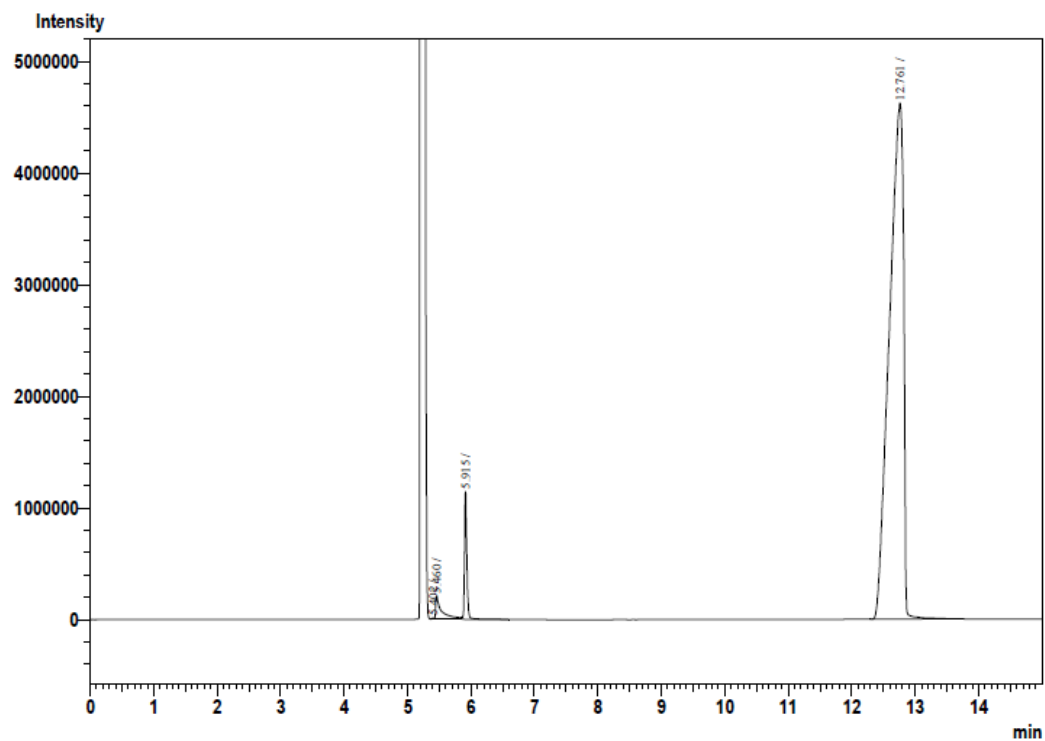

**Fig. S6** GC data for condensation of acetyl acetone and aniline

### GC data for condensation of acetyl acetone and aniline

| Peak#        | Ret.Time | Area            | Height         | Area%           |
|--------------|----------|-----------------|----------------|-----------------|
| 1            | 5.402    | 21255           | 11289          | 0.0279          |
| 2            | 5.460    | 1404185         | 204179         | 1.8457          |
| 3            | 5.915    | 2936351         | 1138087        | 3.8597          |
| 4            | 12.761   | 71716132        | 4622075        | 94.2667         |
| <b>Total</b> |          | <b>76077923</b> | <b>5975630</b> | <b>100.0000</b> |

## 2. Condensation of ethyl acetoacetate and aniline (Table 2, entry 2)

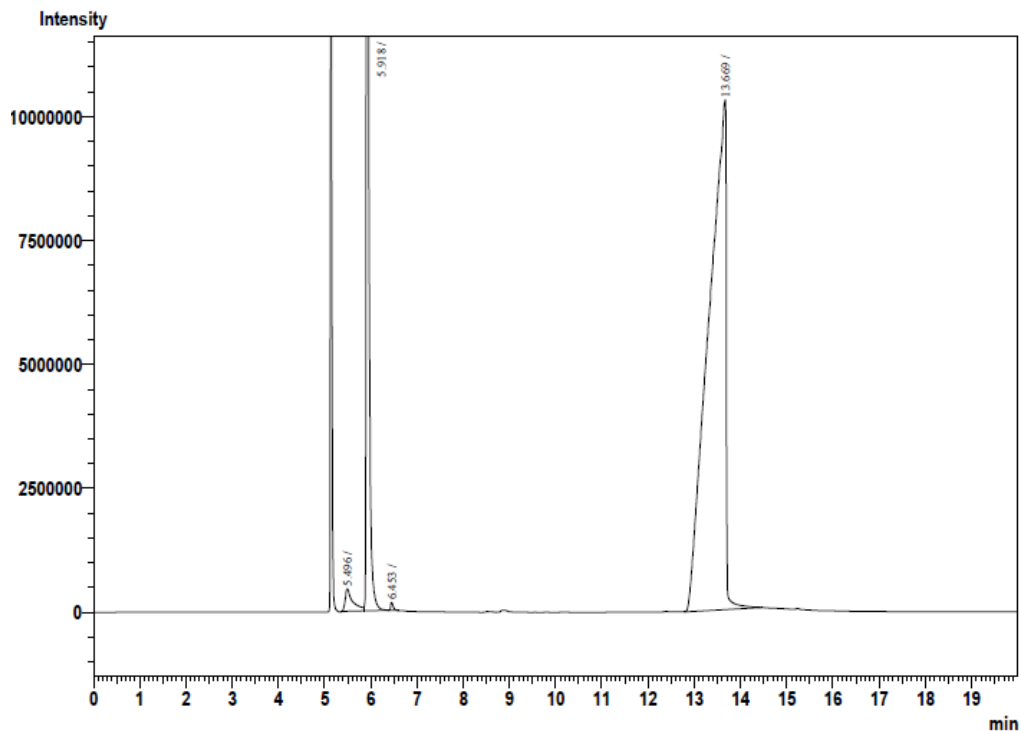

**Fig. S7** GC DATA for Condensation of ethylacetoacetate and aniline

### GC data for Condensation of ethylacetoacetate and aniline

| Peak#        | Ret.Time | Area             | Height          | Area%           |
|--------------|----------|------------------|-----------------|-----------------|
| 1            | 5.496    | 5126790          | 449602          | 1.3939          |
| 2            | 5.918    | 92142417         | 25779115        | 25.0515         |
| 3            | 6.453    | 616068           | 160379          | 0.1675          |
| 4            | 13.669   | 269926771        | 10282438        | 73.3871         |
| <b>Total</b> |          | <b>367812046</b> | <b>36671534</b> | <b>100.0000</b> |

### 3. Condensation of trifluoroacetylacetate and aniline (Table 2, entry 3)

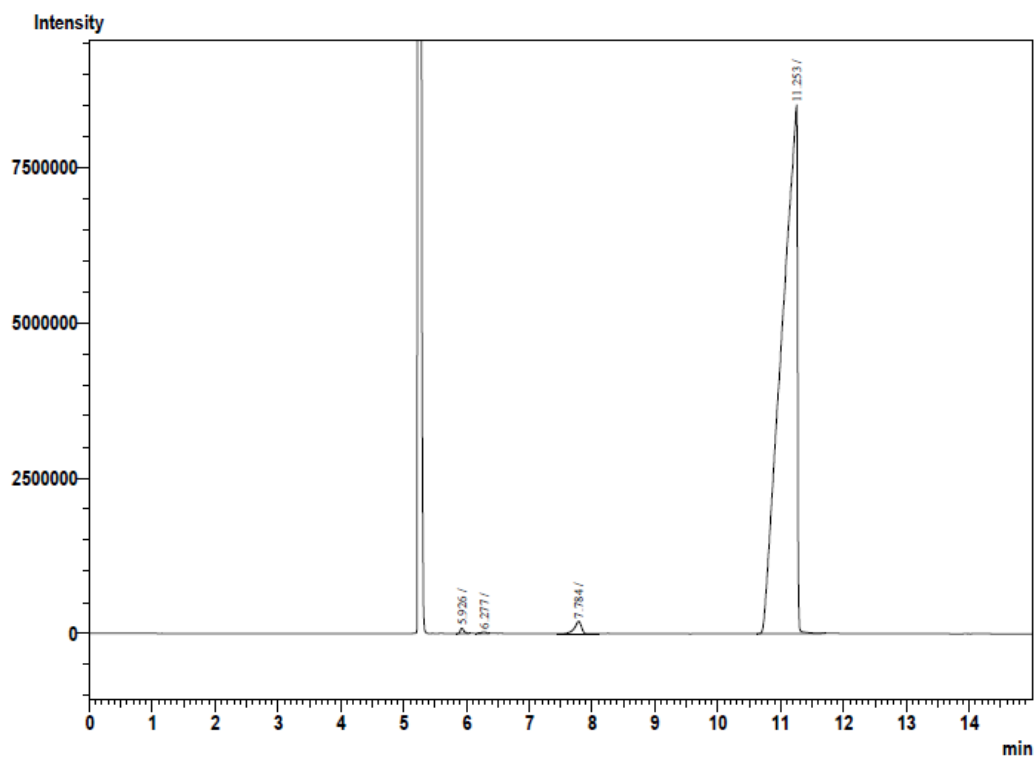

Fig. S8 GC DATA for Condensation of trifluoroacetylacetate and aniline

#### GC data for Condensation of trifluoroacetylacetate and aniline

| Peak#        | Ret.Time | Area             | Height         | Area%           |
|--------------|----------|------------------|----------------|-----------------|
| 1            | 5.926    | 334221           | 82503          | 0.2248          |
| 2            | 6.277    | 141336           | 25258          | 0.0951          |
| 3            | 7.784    | 1530359          | 200271         | 1.0293          |
| 4            | 11.253   | 146680722        | 8495269        | 98.6509         |
| <b>Total</b> |          | <b>148686638</b> | <b>8803301</b> | <b>100.0000</b> |

#### 4. Condensation of methyl acetoacetate and aniline (Table 2, entry 4)

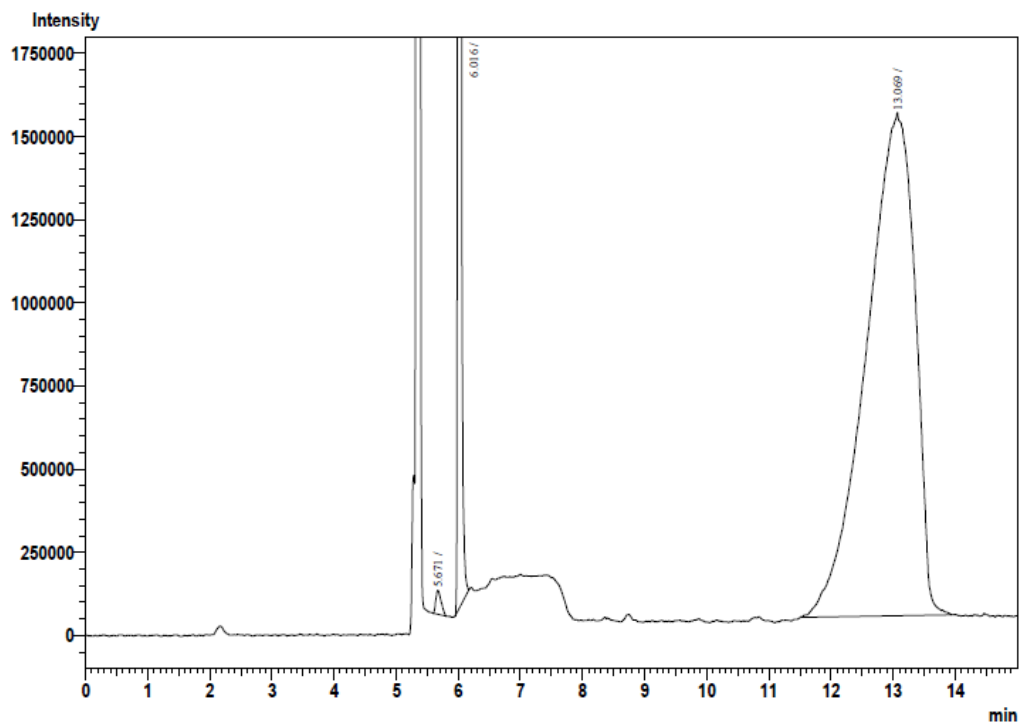

Fig. S9 GC DATA for Condensation of methyl acetoacetate and aniline

#### GC data for Condensation of methyl acetoacetate and aniline

| Peak#        | Ret.Time | Area      | Height  | Area%    |
|--------------|----------|-----------|---------|----------|
| 1            | 5.671    | 422854    | 71712   | 0.3982   |
| 2            | 6.016    | 23708957  | 7761063 | 22.3247  |
| 3            | 13.069   | 82068723  | 1512746 | 77.2771  |
| <b>Total</b> |          | 106200534 | 9345521 | 100.0000 |



### 5. Condensation of acetylacetone and cyclohexylamine (Table 2, entry 5)

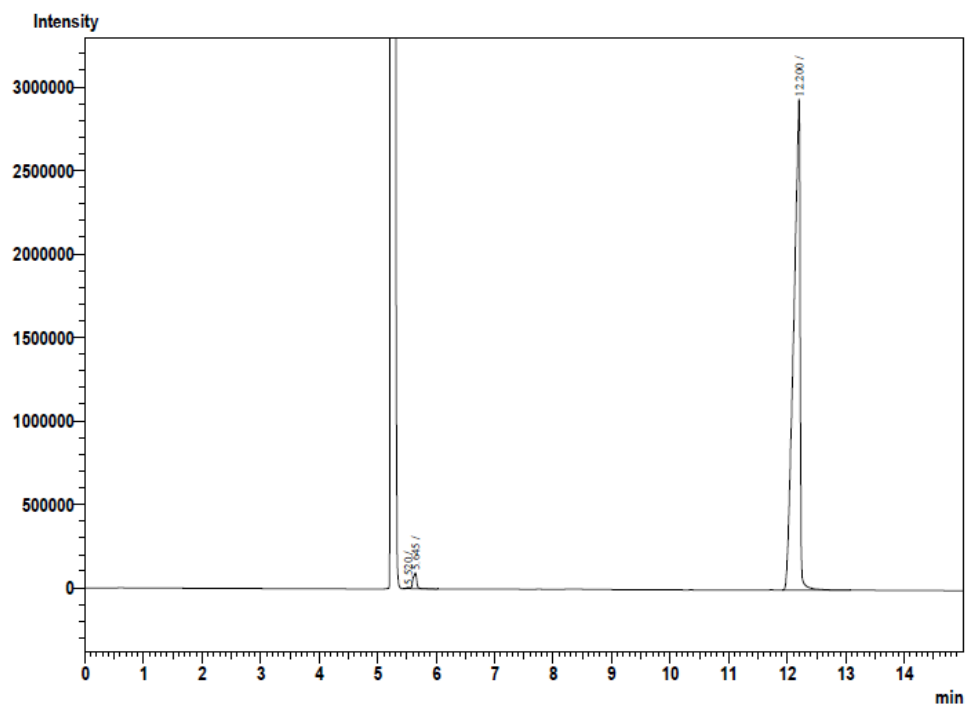

**Fig. S10** GC DATA for Condensation of acetylacetone and cyclohexylamine

#### GC data for Condensation of acetylacetone and cyclohexylamine

| Peak#        | Ret.Time | Area            | Height         | Area%           |
|--------------|----------|-----------------|----------------|-----------------|
| 1            | 5.520    | 33750           | 7930           | 0.1472          |
| 2            | 5.645    | 417821          | 95935          | 1.8219          |
| 3            | 12.200   | 22481168        | 2931881        | 98.0309         |
| <b>Total</b> |          | <b>22932739</b> | <b>3035746</b> | <b>100.0000</b> |

## 6. Condensation of ethylacetoacetate and cyclohexylamine (Table 2, entry 6)

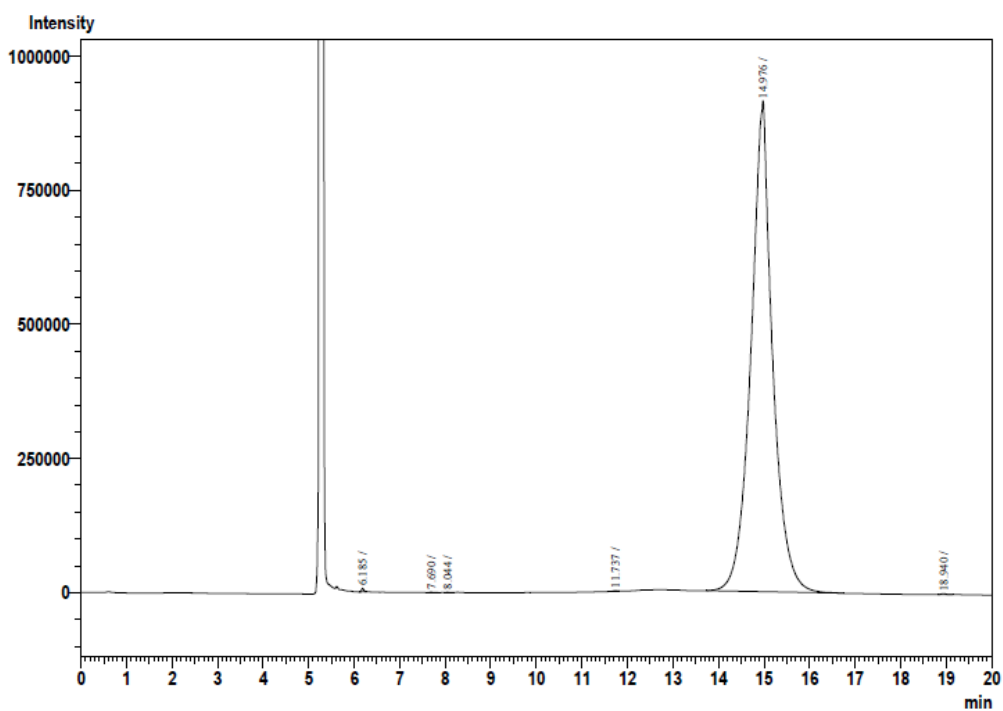

**Fig. S11** GC DATA for Condensation of ethylacetoacetate and cyclohexylamine

### GC data for Condensation of ethylacetoacetate and cyclohexylamine

| Peak#        | Ret.Time | Area            | Height        | Area%           |
|--------------|----------|-----------------|---------------|-----------------|
| 1            | 6.185    | 22594           | 6551          | 0.0749          |
| 2            | 7.690    | 7613            | 1353          | 0.0252          |
| 3            | 8.044    | 4828            | 1045          | 0.0160          |
| 4            | 11.737   | 6637            | 1365          | 0.0220          |
| 5            | 14.976   | 30119213        | 914567        | 99.8249         |
| 6            | 18.940   | 11163           | 1382          | 0.0370          |
| <b>Total</b> |          | <b>30172048</b> | <b>926263</b> | <b>100.0000</b> |

### 7. Condensation of trifluoroacetylacetate and cyclohexylamine (Table 2, entry 7)

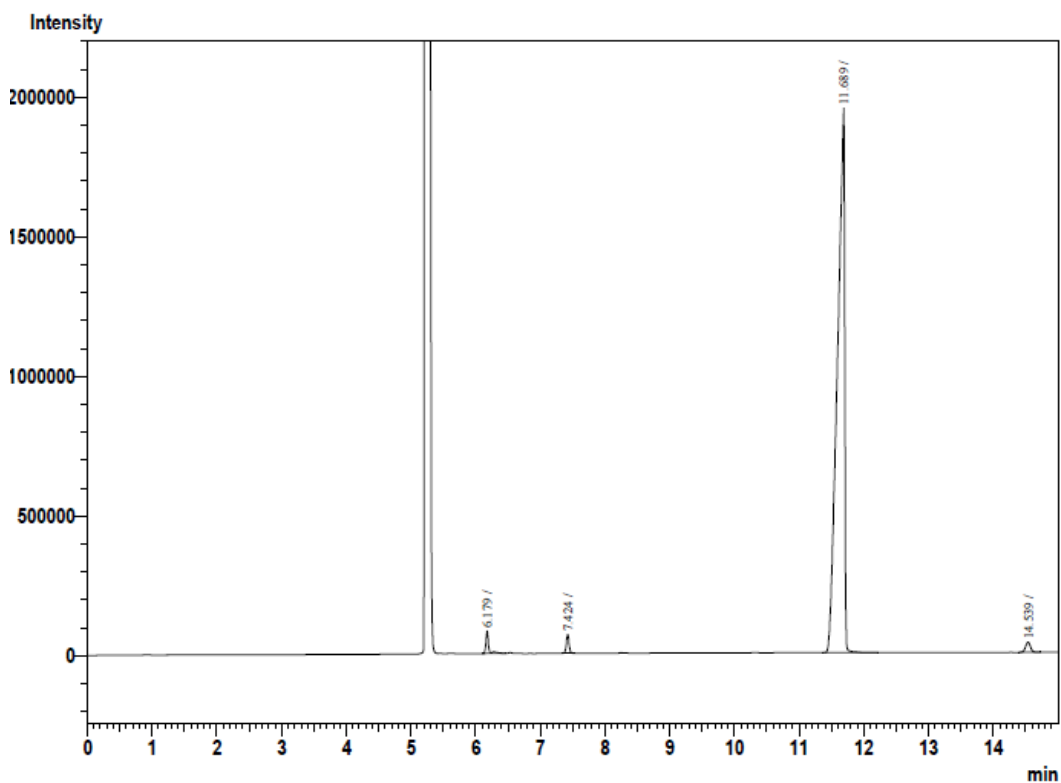

Fig. S12 GC DATA for Condensation of trifluoroacetylacetate and cyclohexylamine

#### GC data for Condensation of trifluoroacetylacetate and cyclohexylamine

| Peak#        | Ret.Time | Area            | Height         | Area%           |
|--------------|----------|-----------------|----------------|-----------------|
| 1            | 6.179    | 232050          | 79332          | 1.4921          |
| 2            | 7.424    | 193411          | 66905          | 1.2436          |
| 3            | 11.689   | 14939433        | 1943871        | 96.0586         |
| 4            | 14.539   | 187518          | 35793          | 1.2057          |
| <b>Total</b> |          | <b>15552412</b> | <b>2125901</b> | <b>100.0000</b> |

## 8. Condensation of methyl acetoacetate and cyclohexylamine (Table 2, entry 8)

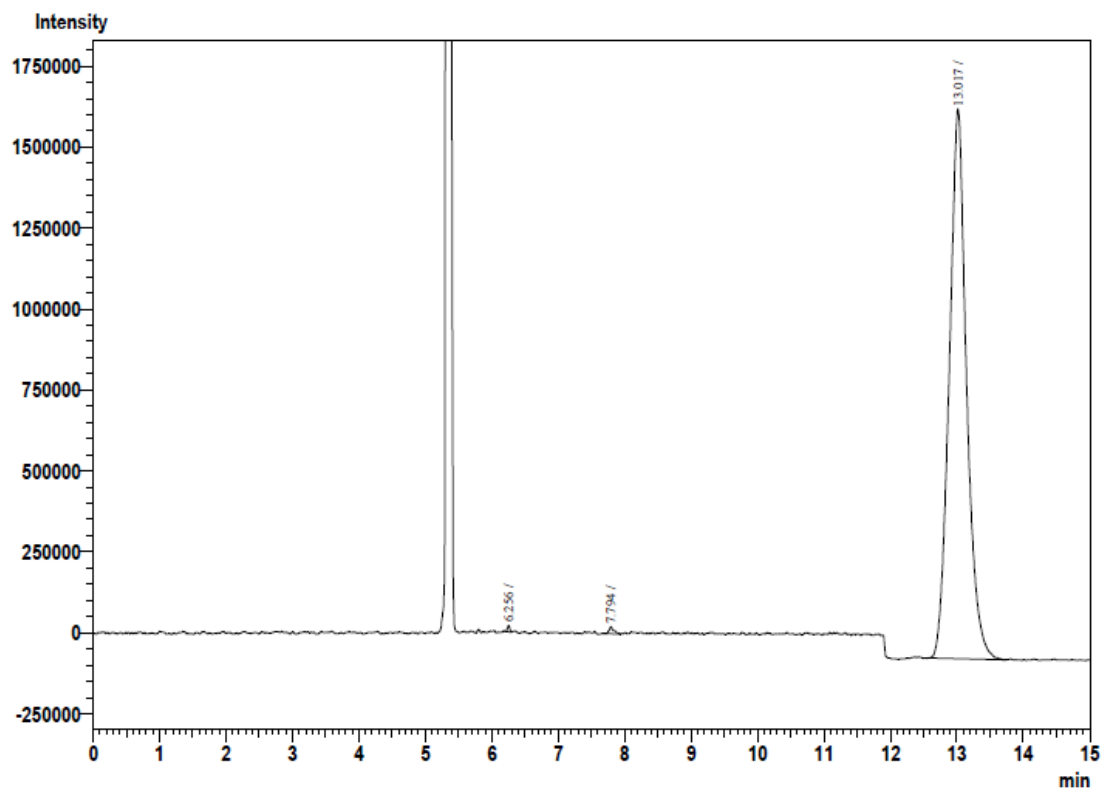

Fig. S13 GC DATA for Condensation of methyl acetoacetate and cyclohexylamine

### GC data for Condensation of methyl acetoacetate and cyclohexylamine

| Peak#        | Ret.Time | Area            | Height         | Area%           |
|--------------|----------|-----------------|----------------|-----------------|
| 1            | 6.256    | 47913           | 20190          | 0.1555          |
| 2            | 7.794    | 107977          | 21762          | 0.3504          |
| 3            | 13.017   | 30660148        | 1696333        | 99.4941         |
| <b>Total</b> |          | <b>30816038</b> | <b>1738285</b> | <b>100.0000</b> |

### 9. Condensation of acetylacetone and n-butylamine (Table 2, entry 7)

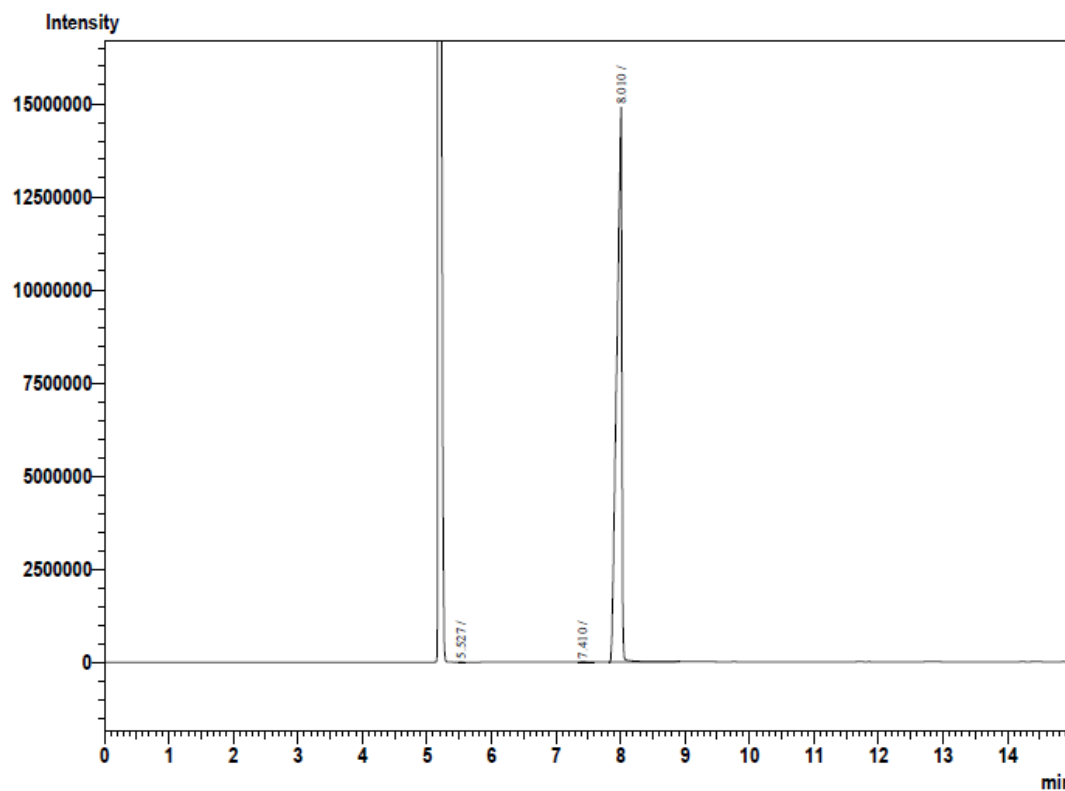

Fig. S14 GC DATA for Condensation of acetylacetone and n-butylamine

#### GC data for Condensation of acetylacetone and n-butylamine

| Peak#        | Ret.Time | Area            | Height          | Area%           |
|--------------|----------|-----------------|-----------------|-----------------|
| 1            | 5.527    | 9509            | 3545            | 0.0117          |
| 2            | 7.410    | 62658           | 17115           | 0.0769          |
| 3            | 8.010    | 81417106        | 14851755        | 99.9114         |
| <b>Total</b> |          | <b>81489273</b> | <b>14872415</b> | <b>100.0000</b> |

### 10. Condensation of ethylacetoacetate and n-butylamine (Table 2, entry 8)

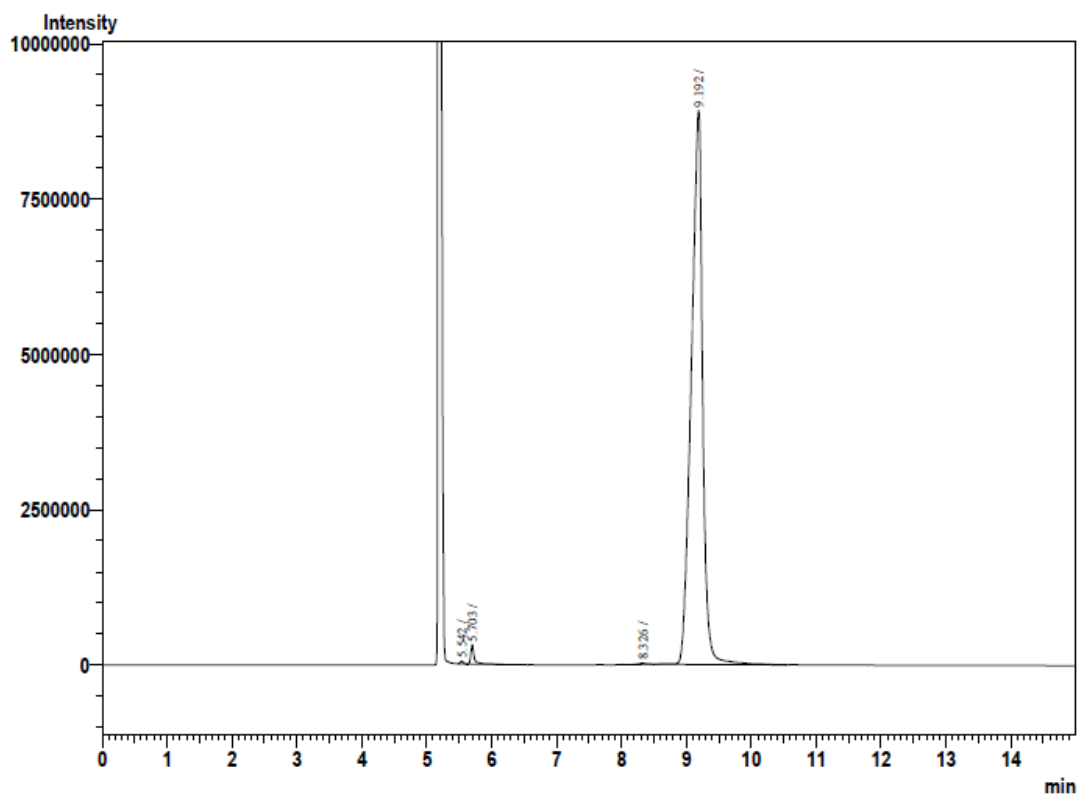

Fig. S15 GC DATA for Condensation of ethylacetoacetate and n-butylamine

### GC data for Condensation of acetylacetone and n-butylamine

| Peak#        | Ret.Time | Area             | Height         | Area%           |
|--------------|----------|------------------|----------------|-----------------|
| 1            | 5.542    | 128780           | 43313          | 0.1174          |
| 2            | 5.703    | 1199472          | 309589         | 1.0937          |
| 3            | 8.326    | 165681           | 20131          | 0.1511          |
| 4            | 9.192    | 108176508        | 8915059        | 98.6378         |
| <b>Total</b> |          | <b>109670441</b> | <b>9288092</b> | <b>100.0000</b> |

### 11. Condensation of trifluoroacetoacetate and n-butylamine (Table 2, entry 9)

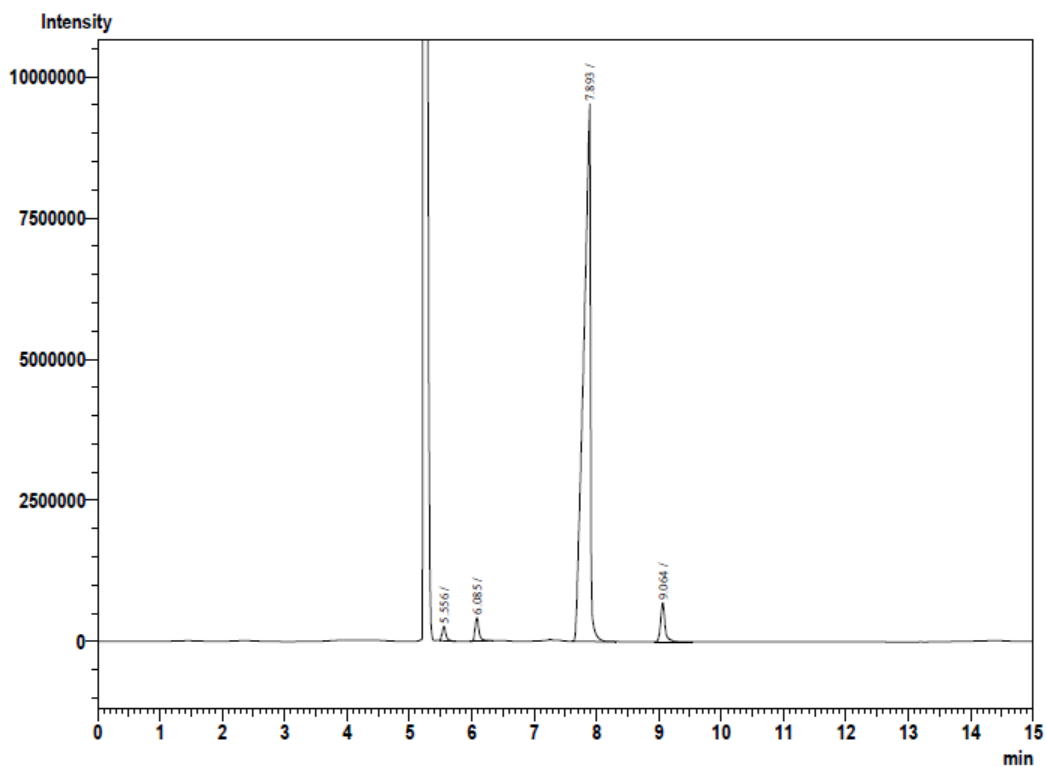

**Fig. S16** GC DATA for Condensation of trifluoroacetoacetate and n-butylamine

#### GC data for Condensation of trifluoroacetoacetate and n-butylamine

| Peak#        | Ret.Time | Area            | Height          | Area%           |
|--------------|----------|-----------------|-----------------|-----------------|
| 1            | 5.556    | 1037038         | 258144          | 1.3141          |
| 2            | 6.085    | 1785654         | 414085          | 2.2628          |
| 3            | 7.893    | 72669650        | 9400022         | 92.0868         |
| 4            | 9.064    | 3421961         | 689381          | 4.3363          |
| <b>Total</b> |          | <b>78914303</b> | <b>10761632</b> | <b>100.0000</b> |

## 12. Condensation of methyl acetoacetate and n-butylamine (Table 2, entry 12)

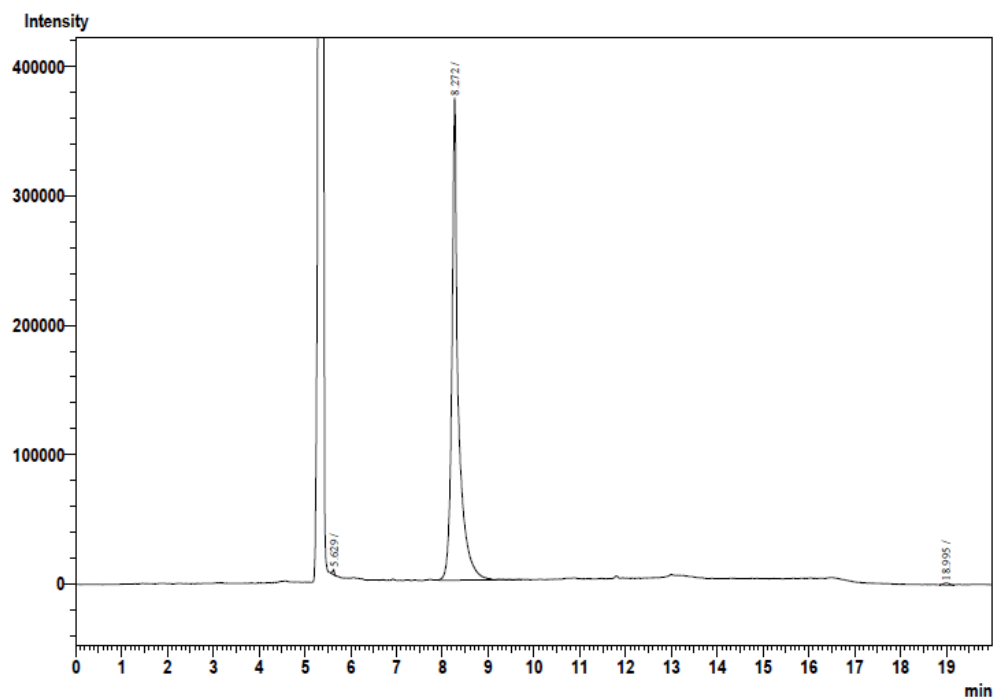

**Fig. S17** GC DATA for Condensation of methyl acetoacetate and n-butylamine

### GC data for Condensation of methyl acetoacetate and n-butylamine

| Peak#        | Ret.Time | Area           | Height        | Area%           |
|--------------|----------|----------------|---------------|-----------------|
| 1            | 5.629    | 10818          | 3979          | 0.2912          |
| 2            | 8.272    | 3690704        | 372385        | 99.3442         |
| 3            | 18.995   | 13547          | 1568          | 0.3646          |
| <b>Total</b> |          | <b>3715069</b> | <b>377932</b> | <b>100.0000</b> |



### 13. Condensation of methyl benzoyl acetate and n-butylamine (Table 2, entry 13)

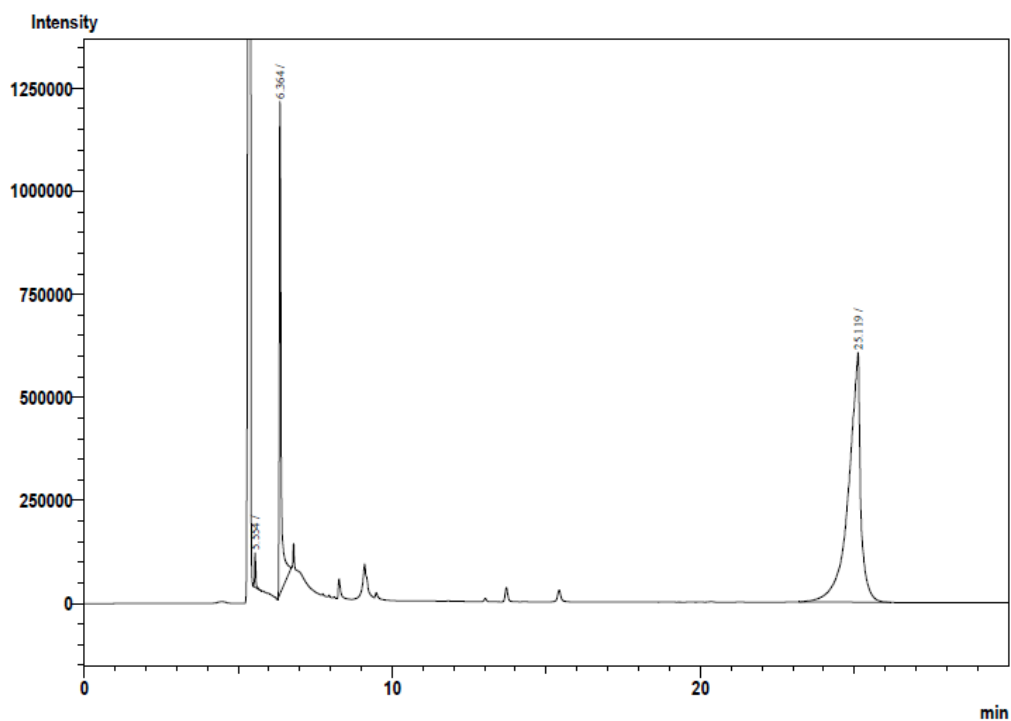

Fig. S18 GC DATA for Condensation of methyl benzoyl acetate and n-butylamine

#### GC data for Condensation of methyl benzoyl acetate and n-butylamine

| Peak# | Ret.Time | Area     | Height  | Area%    |
|-------|----------|----------|---------|----------|
| 1     | 5.554    | 215541   | 82353   | 0.9972   |
| 2     | 6.364    | 4738113  | 1191921 | 21.9215  |
| 3     | 25.119   | 16660302 | 606024  | 77.0812  |
| Total |          | 21613956 | 1880298 | 100.0000 |

#### 14. Condensation of acetyl acetone and 2-chloroaniline (Table 2, entry 14)

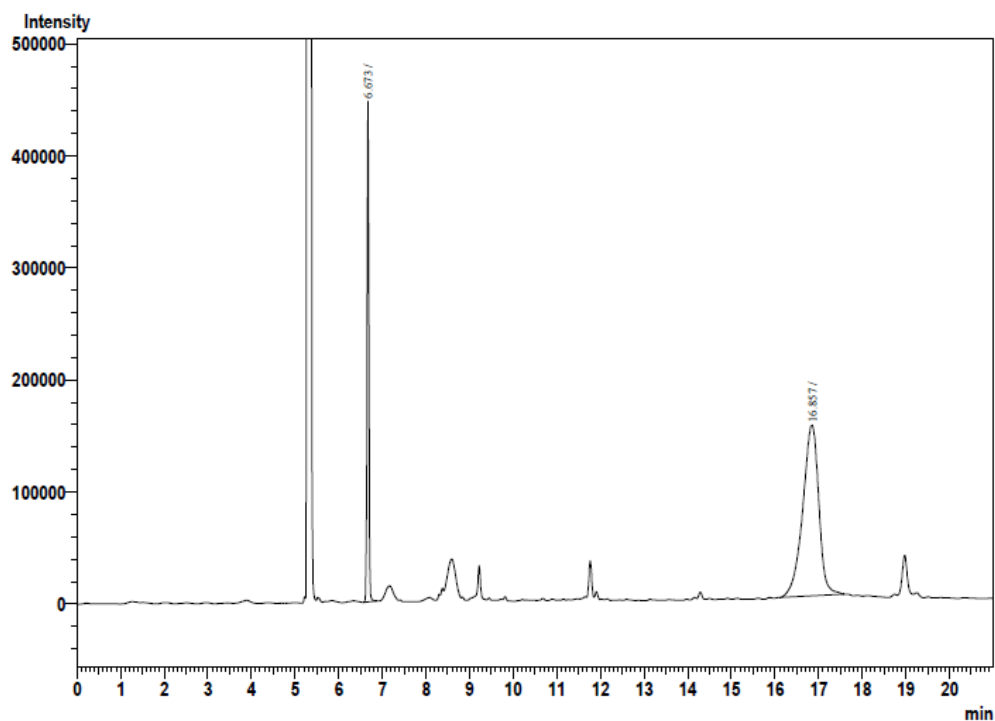

**Fig. S19** GC DATA for Condensation of acetyl acetone and 2-chloroaniline

#### GC data for Condensation of acetyl acetone and 2-chloroaniline

| Peak#        | Ret.Time | Area           | Height        | Area%           |
|--------------|----------|----------------|---------------|-----------------|
| 1            | 6.673    | 1269026        | 445327        | 24.5330         |
| 2            | 16.857   | 3903708        | 152227        | 75.4670         |
| <b>Total</b> |          | <b>5172734</b> | <b>597554</b> | <b>100.0000</b> |

### 15. Condensation of trifluoro acetyl acetone and 2-chloroaniline (Table 2, entry 15)

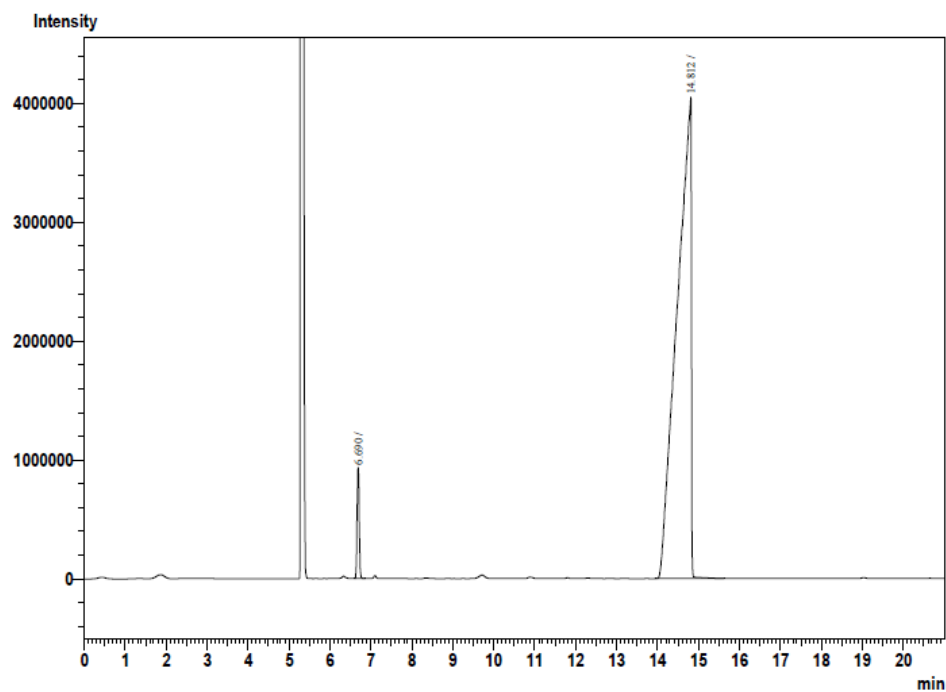

**Fig. S20** GC DATA for Condensation of trifluoro acetyl acetone and 2-chloroaniline

#### GC data for Condensation of trifluoro acetyl acetone and 2-chloroaniline

| Peak#        | Ret.Time | Area            | Height         | Area%           |
|--------------|----------|-----------------|----------------|-----------------|
| 1            | 6.690    | 3405186         | 933074         | 3.4126          |
| 2            | 14.812   | 96377961        | 4044235        | 96.5874         |
| <b>Total</b> |          | <b>99783147</b> | <b>4977309</b> | <b>100.0000</b> |

### 16. Condensation of acetyl acetone and m-toluidine (Table 2, entry 16)

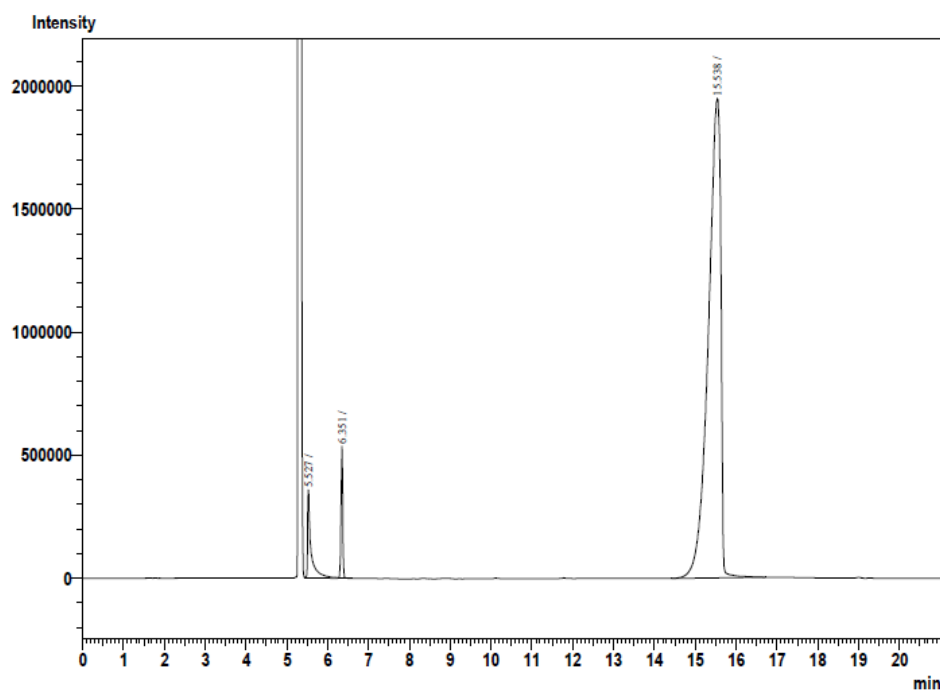

**Fig. S21** GC DATA for Condensation of acetyl acetone and m-toluidine

#### GC data for Condensation of acetyl acetone and m-toluidine

| Peak#        | Ret.Time | Area            | Height         | Area%           |
|--------------|----------|-----------------|----------------|-----------------|
| 1            | 5.527    | 2062374         | 356347         | 4.5742          |
| 2            | 6.351    | 1583090         | 534112         | 3.5112          |
| 3            | 15.538   | 41441512        | 1947276        | 91.9146         |
| <b>Total</b> |          | <b>45086976</b> | <b>2837735</b> | <b>100.0000</b> |

### 17. Condensation of trifluoro acetyl acetone and m-toluidine (Table 2, entry 17)

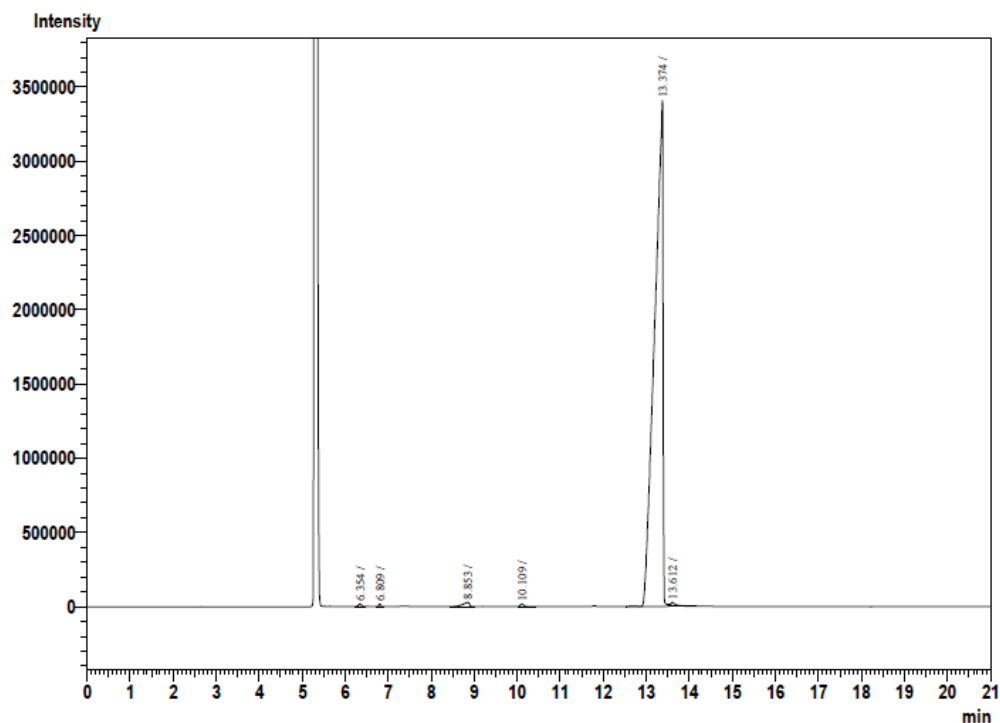

Fig. S22 GC DATA for Condensation of trifluoro acetyl acetone and m-toluidine

#### GC data for Condensation of trifluoro acetyl acetone and m-toluidine

| Peak#        | Ret.Time | Area            | Height         | Area%           |
|--------------|----------|-----------------|----------------|-----------------|
| 1            | 6.354    | 89647           | 17830          | 0.1918          |
| 2            | 6.809    | 55007           | 17978          | 0.1177          |
| 3            | 8.853    | 309734          | 29223          | 0.6625          |
| 4            | 10.109   | 105187          | 19430          | 0.2250          |
| 5            | 13.374   | 45930946        | 3399990        | 98.2477         |
| 6            | 13.612   | 259629          | 27468          | 0.5554          |
| <b>Total</b> |          | <b>46750150</b> | <b>3511919</b> | <b>100.0000</b> |

### 18. Condensation of acetyl acetone and o-anisidine (Table 2, entry 17)

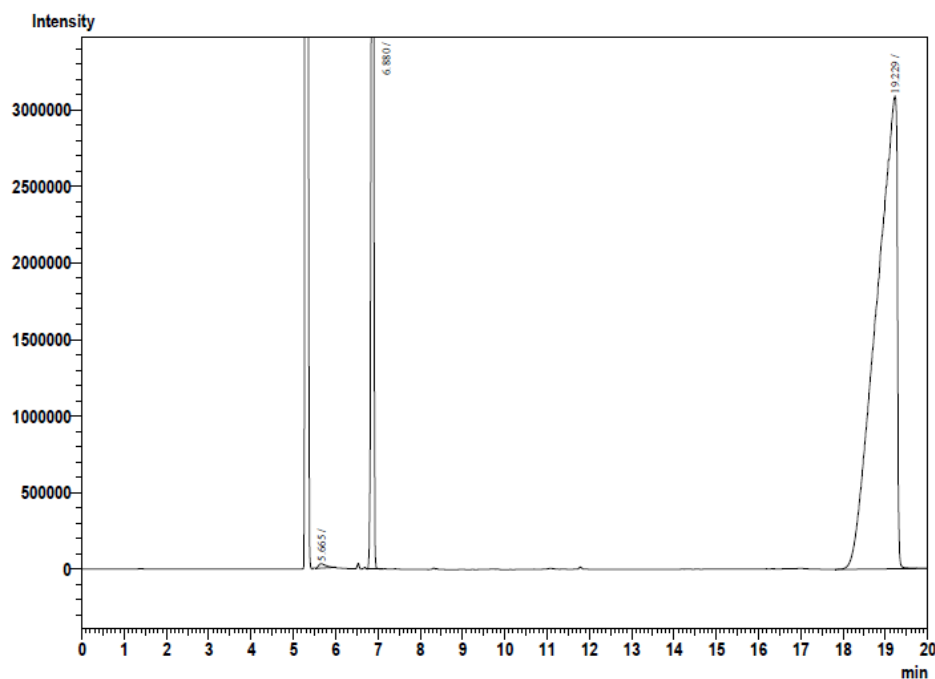

**Fig. S23** GC DATA for Condensation of acetyl acetone and o-anisidine

#### GC data for Condensation of acetyl acetone and o-anisidine

| Peak#        | Ret.Time | Area             | Height          | Area%           |
|--------------|----------|------------------|-----------------|-----------------|
| 1            | 5.665    | 327595           | 27747           | 0.2338          |
| 2            | 6.880    | 34672372         | 10138115        | 24.7459         |
| 3            | 19.229   | 105113382        | 3088428         | 75.0202         |
| <b>Total</b> |          | <b>140113349</b> | <b>13254290</b> | <b>100.0000</b> |

## NMR spectra of representative products

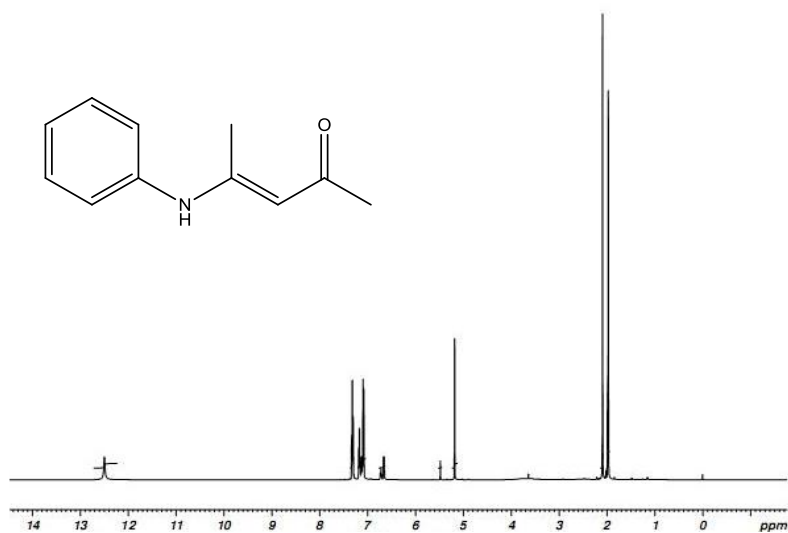

**Fig. S24** <sup>1</sup>H-NMR spectrum of 4-(phenylamino)pent-3-en-2-one

<sup>1</sup>H NMR (400 MHz, CDCl<sub>3</sub>): 1.990 (s, 3H), 2.095 (s, 3H), 5.185 (s, 1H), 5.483 (s, 2H), 6.722 (m, 1H), 7.320 (t, 2H), 12.493 (s, 1H).

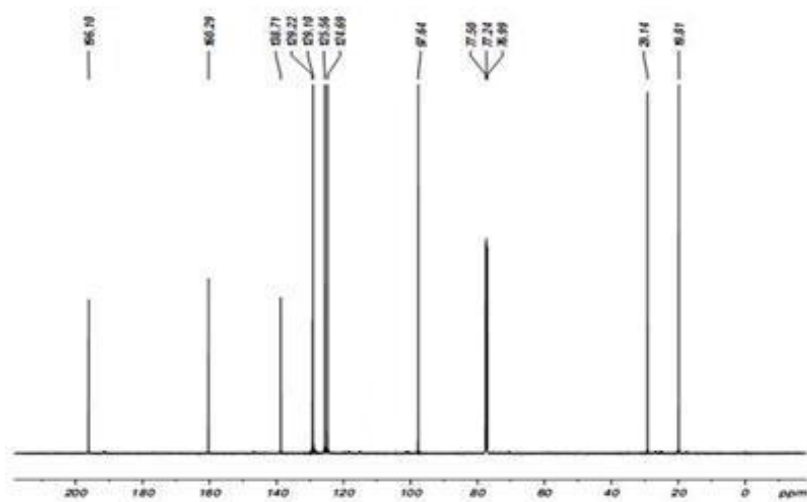

**Fig. S25** <sup>13</sup>C-NMR spectrum of 4-(phenylamino)pent-3-en-2-one

<sup>13</sup>C NMR (100 MHz, CDCl<sub>3</sub>): 19.51 (-CH<sub>3</sub>), 20.14 (-CH<sub>3</sub>), 97.64 (-CH), 125.56 (-CH), 129.22 (-CH), 138.71 (-CH), 160.29 (-CH), 186.10 (-C=O).

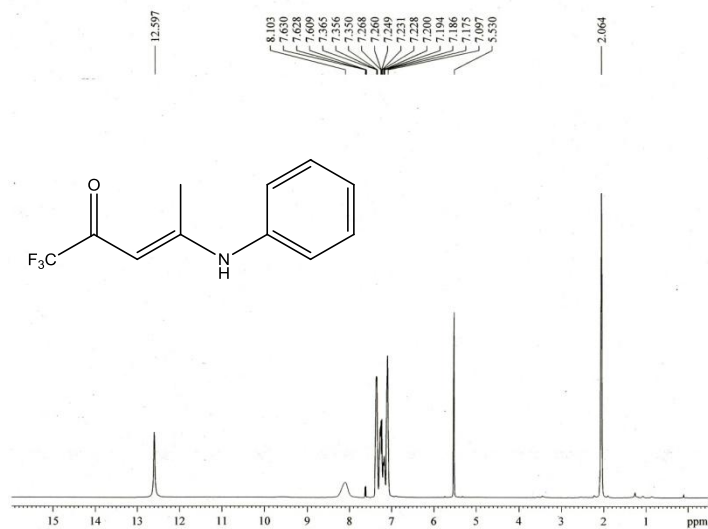

**Fig. S26** <sup>1</sup>H-NMR spectrum of 1,1,1-trifluoro-4-(phenylamino)pent-3-en-2-one

<sup>1</sup>H NMR (400 MHz, CDCl<sub>3</sub>): 2.063 (s, 3H), 5.530 (s, 1H), 7.097-78.103(m, 5H), 12.597 (s, 1H).

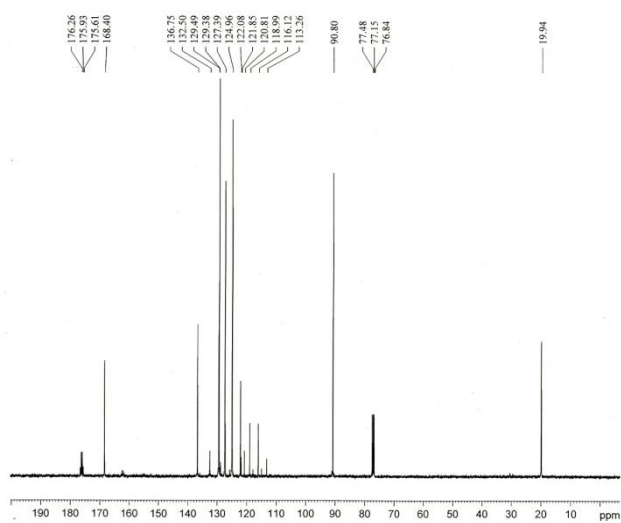

**Fig. S27** <sup>13</sup>C-NMR spectrum of 1,1,1-trifluoro-4-(phenylamino)pent-3-en-2-one

<sup>13</sup>C NMR (100 MHz, CDCl<sub>3</sub>): 19.94 (-CH<sub>3</sub>), 90.80 (-CH), 124.96 (-CH), 127.39 (-CH), 129.49 (-C), 136.75 (-C), 168.40 (-C=O), 175.93 (-CF<sub>3</sub>).



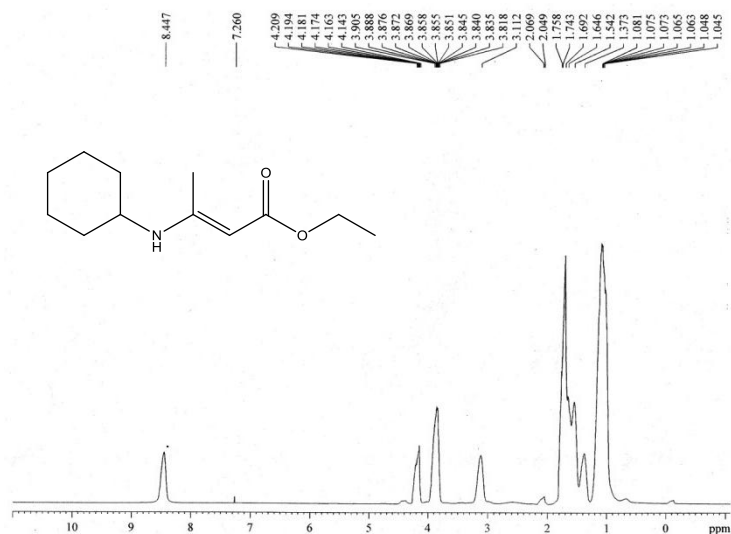

**Fig. S28**  $^1\text{H}$ -NMR spectrum of ethyl-3-(cyclohexylamino)-but-2-enoate

$^1\text{H}$  NMR (400 MHz,  $\text{CDCl}_3$ ): 1.045-1.081(m, 4H), 1.373 (m, 3H), 1.542-1.649 (m, 4H), 1.743-1.758 (m, 2H), 2.069 (s, 3H), 3.112 (m, 1H), 3.855 (s, 1H) 4.143-4.209 (m, 2H), 8.447 (s, 1H).

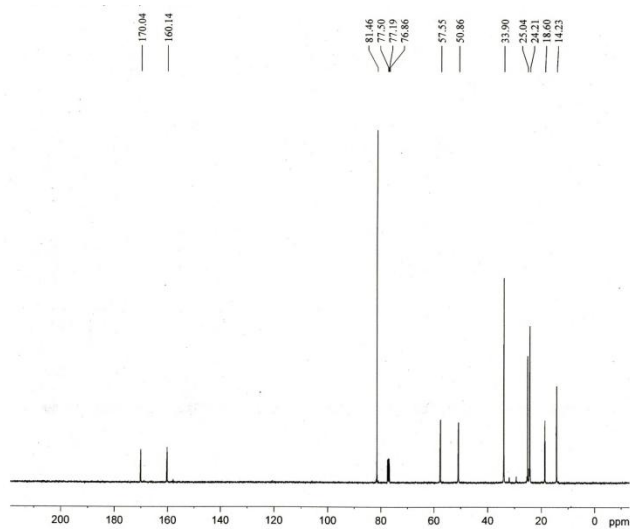

**Fig. S29**  $^{13}\text{C}$ -NMR spectrum of ethyl-3-(cyclohexylamino)-but-2-enoate

$^{13}\text{C}$  NMR (100 MHz,  $\text{CDCl}_3$ ): 14.23 (- $\text{CH}_3$ ), 18.60 (- $\text{CH}_3$ ), 24.21-25.04 (- $\text{CH}_2$ ), 33.90 (- $\text{CH}_2$ ), 50.86(- $\text{CH}$ ), 57.55 (- $\text{CH}_2$ ), 81.46 (- $\text{CH}$ ), 160.14 (- $\text{C}$ ), 170.04 (- $\text{C}=\text{O}$ ).

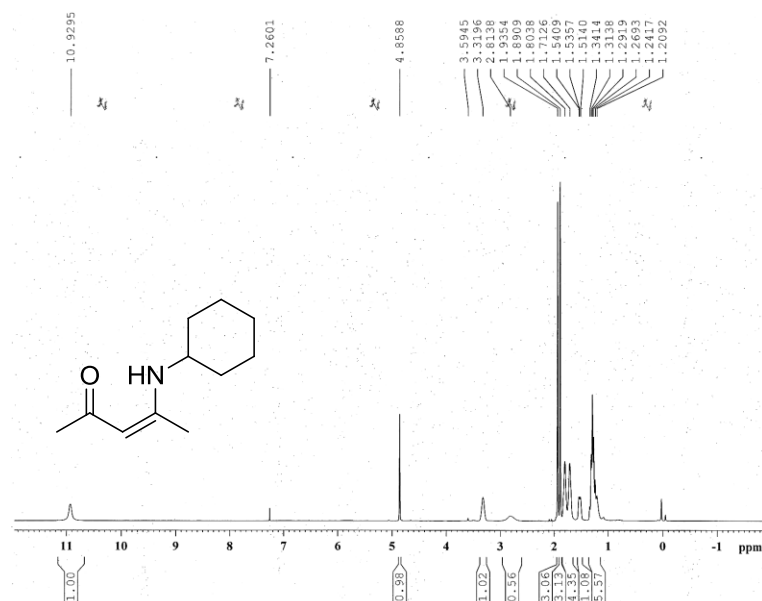

**Fig. S30** <sup>1</sup>H-NMR spectrum of 4-(cyclohexylamino)pent-3-en-2-one

<sup>1</sup>H NMR (400 MHz, CDCl<sub>3</sub>): 1.269 (m, 4H), 1.341 (m, 2H), 1.54-1.803 (m, 4H), 1.890 (s, 3H), 1.935 (s, 3H), 3.594 (s, 1H), 4.858 (s, 1H), 10.929 (s, 1H).

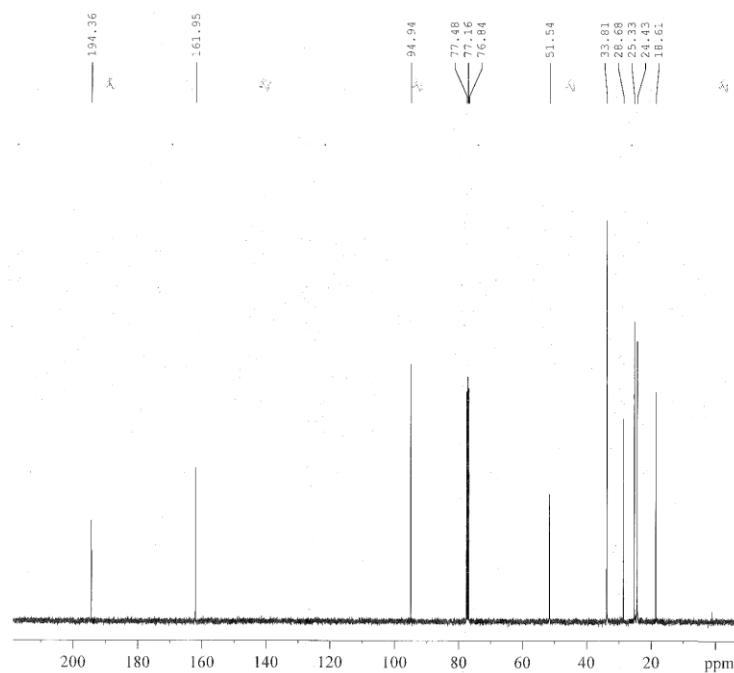

**Fig. S31** <sup>13</sup>C-NMR spectrum of 4-(cyclohexylamino)pent-3-en-2-one

<sup>13</sup>C NMR (100 MHz, CDCl<sub>3</sub>): 18.61 (-CH<sub>3</sub>), 24.43 (-CH<sub>2</sub>), 25.33 (-CH<sub>2</sub>), 28.68 (-CH<sub>3</sub>), 33.81 (-CH<sub>2</sub>), 51.54 (-CH), 94.94 (-CH), 161.95 (-C), 194.36 (-C=O).

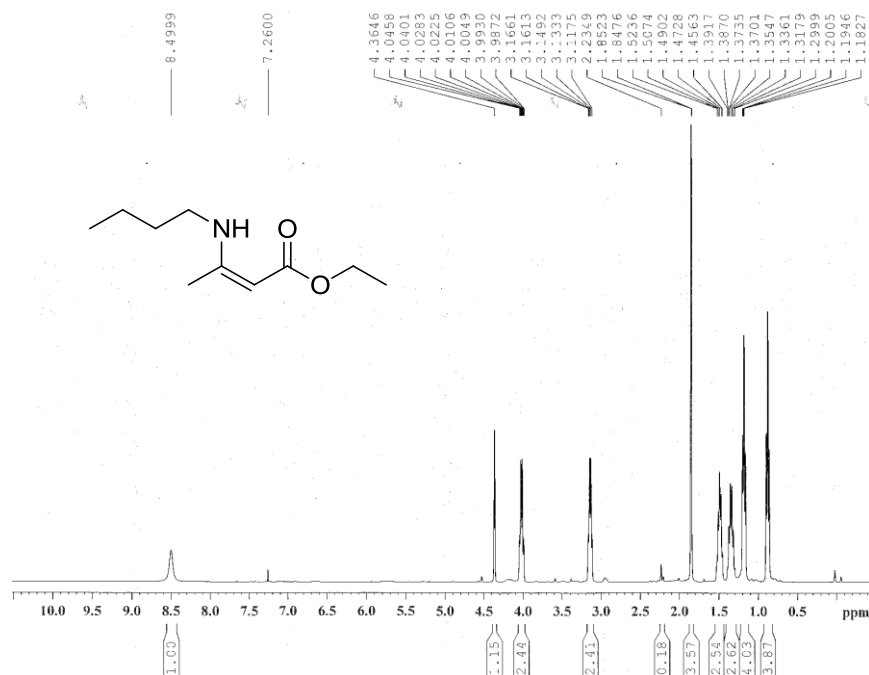

**Fig. S32**  $^1\text{H}$ -NMR spectrum of Ethyl 3-(butylamino)but-2-enoate

$^1\text{H}$  NMR (400 MHz,  $\text{CDCl}_3$ ): 1.194 (t, 3H), 1.317 (t, 3H), 1.373 (q, 2H), 1.490 (q, 2H), 1.852 (d, 3H), 3.149 (q, 2H), 4.010 (m, 2H), 4.364 (s, 1H), 8.499 (s, 1H).

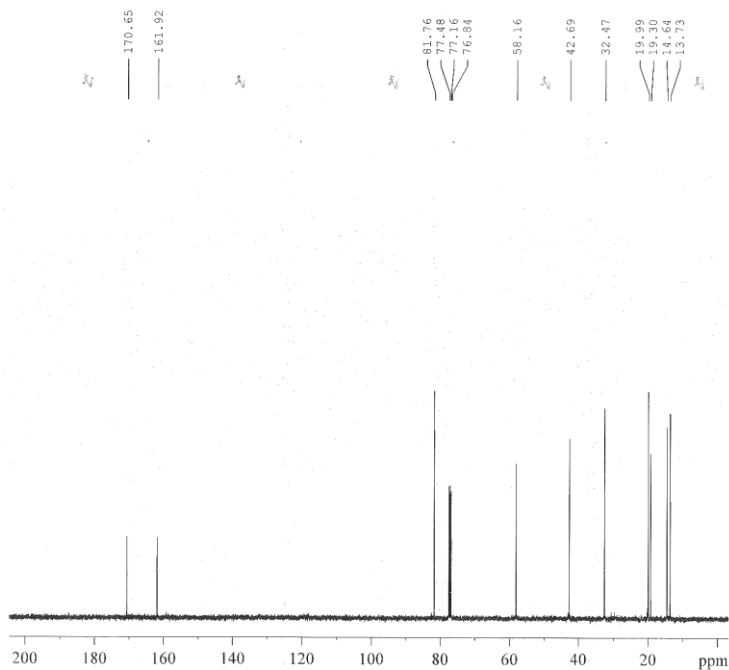

**Fig. S33**  $^{13}\text{C}$ -NMR spectrum of Ethyl 3-(butylamino)but-2-enoate

$^{13}\text{C}$  NMR (100 MHz,  $\text{CDCl}_3$ ): 13.73 (- $\text{CH}_3$ ), 14.64 (- $\text{CH}_3$ ), 19.30 (- $\text{CH}_2$ ), 19.99 (- $\text{CH}_3$ ), 32.47 (- $\text{CH}$ ), 42.69 (- $\text{CH}_2$ ), 58.16 (- $\text{CH}_2$ ), 81.76 (- $\text{CH}$ ), 161.92 (- $\text{C}$ ), 170.65 (- $\text{C}=\text{O}$ ).
